# Supplementary material
Source: PubMed Central journal article supplement (PMC4148811)
Supplement: AEM.01182-14_zam999105539so1.pdf [file AEM.01182-14_zam999105539so1.pdf]

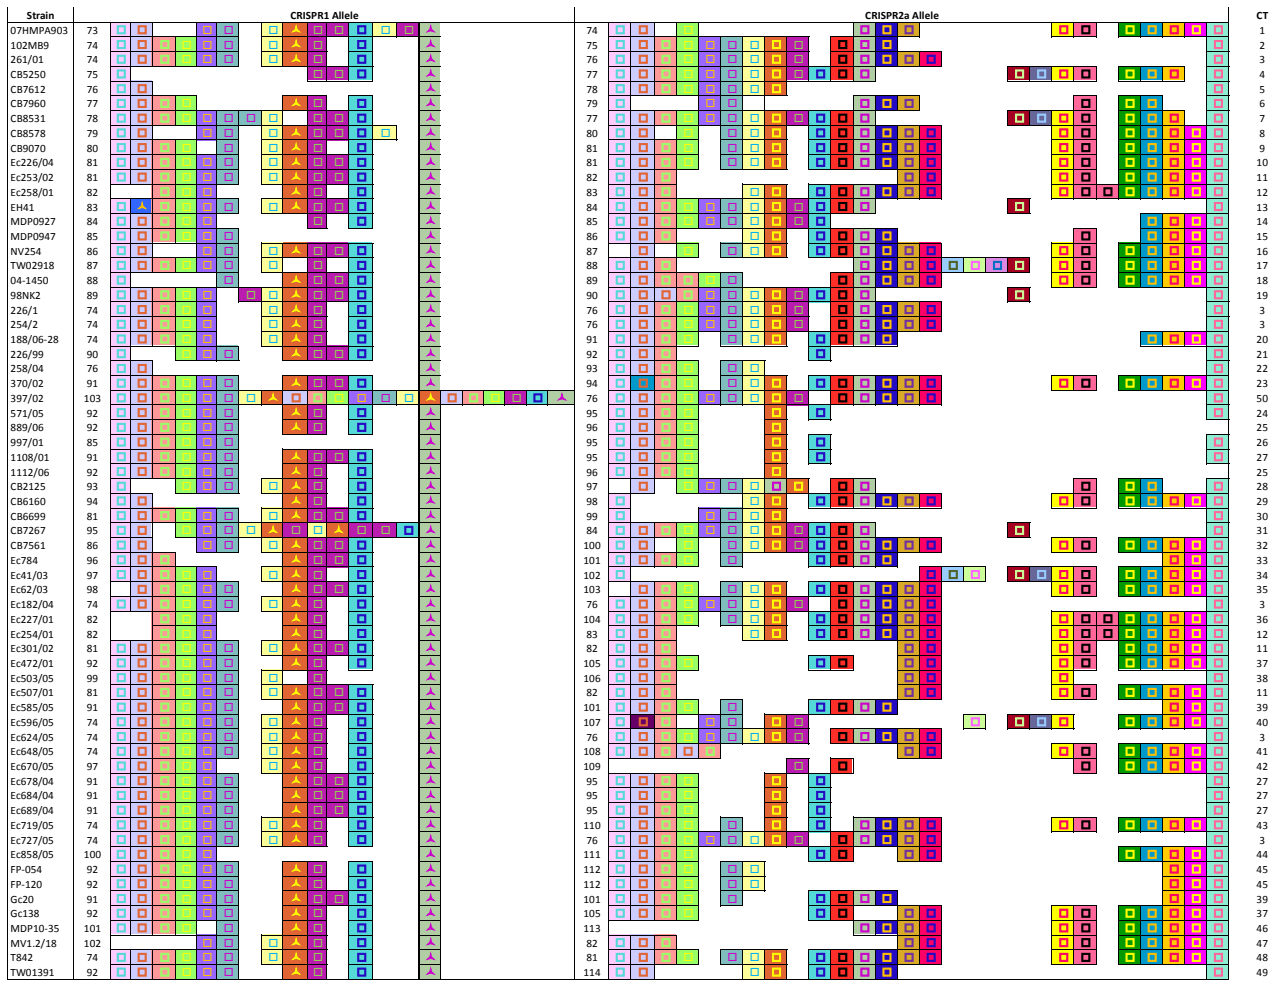

Figure: Graphic representation of spacer arrangements in CRISPR1 and CRISPR2a of the 65 O113:H21 *E. coli* strains. Each unique spacer is represented by a unique color combination of the center shape and background. The shape in the center indicates the spacer length (□ = 32 bp, ▲ = 33 bp). Gaps were introduced to improve alignment of similar CRISPR arrays. CRISPR1 and 2a allele numbers are shown in their respective columns to the left of the CRISPR arrays. Each unique combination of CRISPR1 and CRISPR2a alleles was assigned a CRISPR type (CT) number.
